# Supplementary material for: Highly elastic polymer substrates with tunable mechanical properties for stretchable electronic applications
Source: Royal Society of Chemistry journal article supplement (doi:10.1039/c6ra20428g), 2016-01-01
Supplement: c6ra20428g2.pdf [file c6ra20428g2.pdf]

## Supplementary data

### Highly elastic polymer substrates with tunable mechanical properties for stretchable electronics applications

Srinivas Gandla,<sup>a</sup> Harshad Gupta,<sup>a</sup> Anil Reddy Pininti,<sup>a</sup> Amit Tewari<sup>b</sup> and Dipti Gupta\*<sup>a</sup>

<sup>a</sup>Plastic Electronics and Energy Lab (PEEL), Department of Metallurgical Engineering and Material Science, Indian Institute of Technology Bombay, Powai, Mumbai- 400076, India.

<sup>b</sup>Plastic Electronics and Energy Lab (PEEL), Department of Metallurgical Engineering and Material Science, IITB-Monash Academy, Powai, Mumbai- 400076, India.

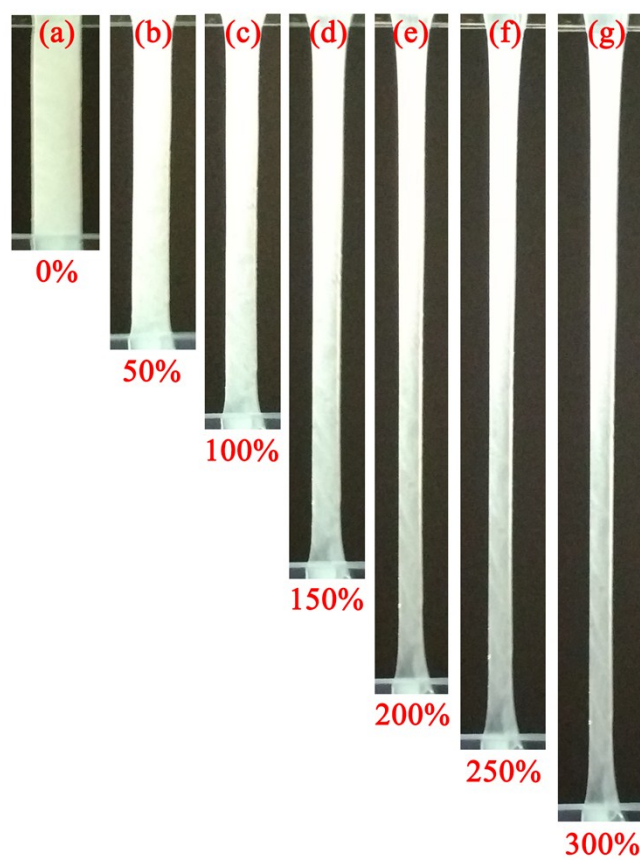

Figure S1. Highly stretchable substrate with 8wt% of PDMS-b-PEO in PDMS (Base: Curing agent) at different elongations ranging from 0% - 300%.

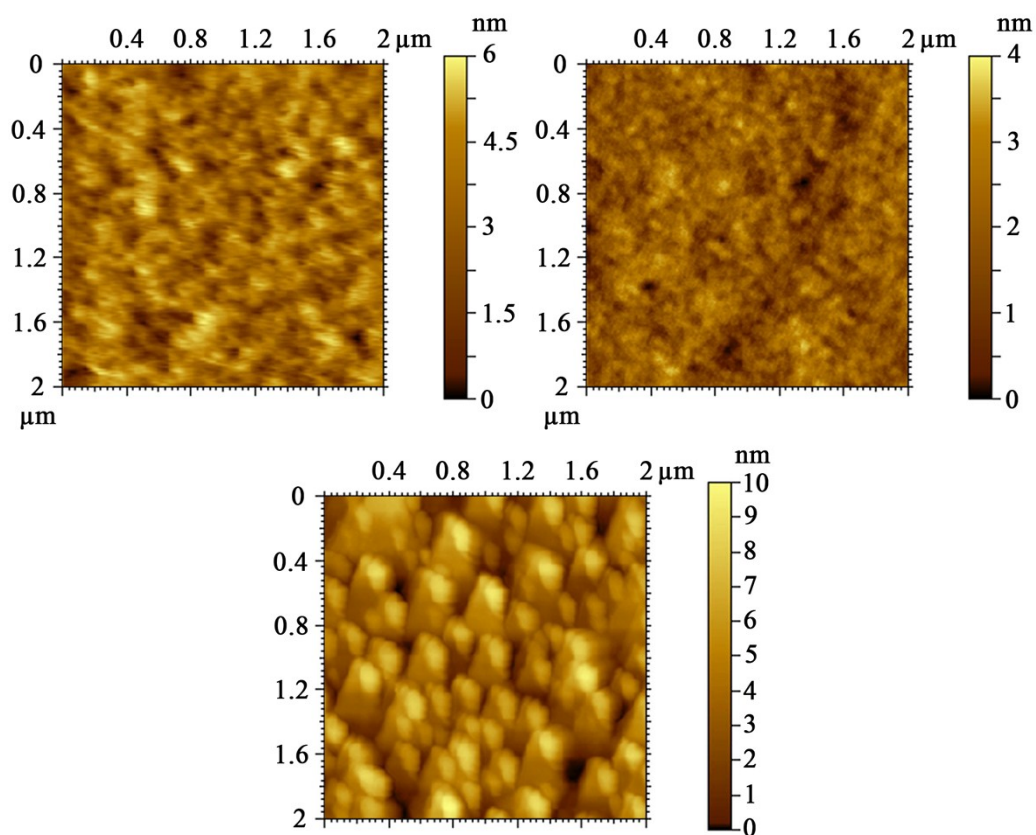

Figure S2. AFM images of (a) SU-8, (b) polystyrene and (c) Pentacene deposited one by one on PMMA coated glass substrate

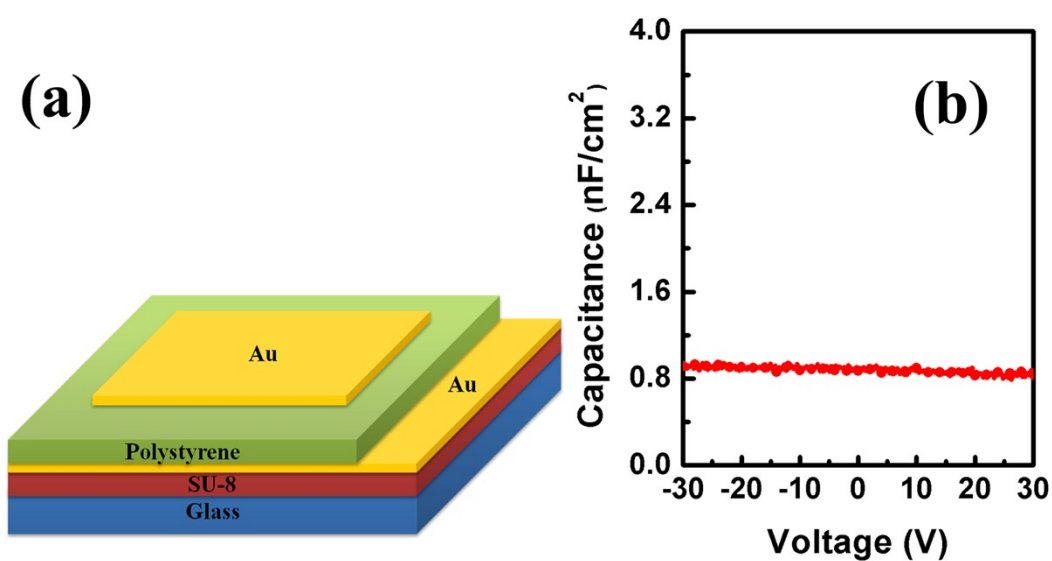

Figure S3. (a) MIM structure of polystyrene dielectric with top and bottom as gold electrode and (b) C-V measurement.
